# Supplementary material
Source: Springer Nature journal article supplement (https://www.springermedizin.de/resource/supplementary/12990_2008_218_MOESM3_ESM.pdf/9612812)

## A AEA

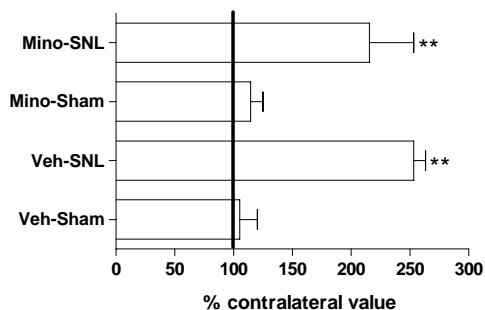

## B 2-AG

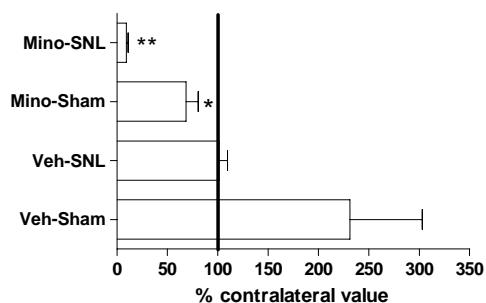

## C OEA

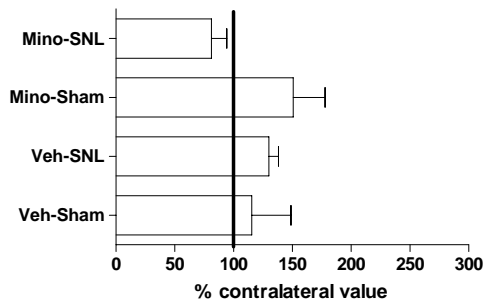

## D PEA

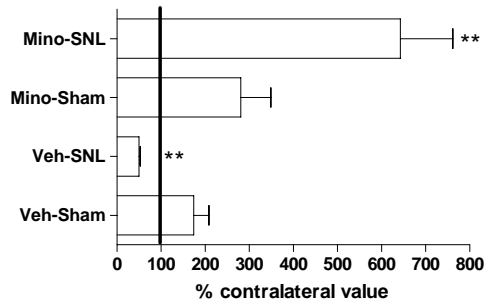

Supplement: MOESM3 [file 9612812]
